# Supplementary material for: Exploring (Collaborative) Generation and Exploitation of Multiple Choice Questions: Likes as Quality Proxy Metric
Source: MDPI journal article supplement (doi:10.3390/educsci12050297), 2022-04-21
Supplement: s1 [file s1]

Archive with 2 entries (2 files):
- QuestionnaireStage1.pdf
- QuestionnaireStage2.pdf
