# Supplementary material for: Exploring (Collaborative) Generation and Exploitation of Multiple Choice Questions: Likes as Quality Proxy Metric
Source: MDPI journal article supplement (doi:10.3390/educsci12050297), 2022-04-21
Supplement: s1 [file s1]

# Appendix A

Questionnaire for assessing students' perceptions in stage 1

## Question 1

Have you participated in the Reading Game (RG)? (Single Selection)

- Yes, regularly, to gain admission to the final exam
- Yes, regularly, because it appealed to me, and I wanted to prepare for the final exam
- Yes, irregularly
- No

## Question 2

How often did you log in regularly during the week? (Single Selection)

- 0 times
- 1 time
- 2-3 times
- More than 3 times

## Question 3

How much time do you estimate you spent logged in regularly per week in total? (Single Selection)

- Up to 5 minutes
- 5-10 minutes
- 10 -20 minutes
- 20 - 40 minutes
- 40 - 60 minutes
- More than 60 minutes

## Question 4

How difficult did you perceive the following actions within the RG to be? (Items)

Rate each on a scale from 1 (very easy) to 6 (extremely difficult)

- Answering an MCQ
- Quizzing
- Having an idea for a new MCQ
- Formulating a new MCQ
- Finding distractors

## Question 5

What actions did you perform in the Reading Game? (Items)

Please rate by frequency (1: never - 5: regularly)

- Answer MCQs
- Ask MCQs

- Report MCQs
- Add likes to MCQs
- Quizzing
- Comment on MCQs

## Question 6

What is your impression of the MCQs' substance? (Items)

To what extent do you agree with the following statements (1: disagree- 6: fully agree).

- The MCQs I answered contain important knowledge of urban water management.
- My MCQs are precise and correct in question, correct answer, and wrong answers.
- The MCQs I answer are precise, clear and correct.
- A MCQ that contains a not or a no is easier to generate.
- Above all, it was important that I fulfilled my quantum as quickly as possible and that the progress bar was green.
- I especially like to answer MCQs that contain a negation.

## Question 7

Which of the following events/information are important to you when operating the RG? (Items)

Rate on a scale of 1 (I do not know) to 6 (Main control information).

- Progress bar becomes green
- Number of MCQs still to answer / generate
- Position in the ranking list
- Names of ranking successors and predecessors
- Points of ranking successors and predecessors
- How often have my MCQs been answered
- Karma assigned
- Stars assigned

## Question 8

How do you evaluate the application of the RG in the course? (Items)

Rate from 1 (Strongly disagree) to 5 (Strongly agree)

- Motivated, when RG MCQs would be in the final exam
- I would have preferred more sample MCQs
- RG is an enrichment for the course
- RG supported me in learning
- RG is a waste of time and is irrelevant for the course.
- RG spurred engagement on a regular base
- RG supports preparation for the final exam
- I operated the RG collaboratively with fellow students

## Question 9

General comments and suggestions for improvement of the Reading Game? (Open Text)

(We are aware that the version used is a prototype and still needs many improvements (e.g., editing function for questions, notification of comments, more types of questions, etc.).

At this point it is interesting for us whether you can imagine that the Reading Game will become a useful and motivating part of the learning process? Which general conditions still need to be improved for making this assessment possible?
