# Supplementary material for: Exploring (Collaborative) Generation and Exploitation of Multiple Choice Questions: Likes as Quality Proxy Metric
Source: MDPI journal article supplement (doi:10.3390/educsci12050297), 2022-04-21
Supplement: s1 [file s1 › QuestionnaireStage2.pdf]

## Appendix B

Questionnaire for assessing students' reasons in stage 2 not to participate in MCQ-based activities (Reading Game and QuizUp)

### Question 1

Have you heard about the topic of Capital Budgeting being covered in the Reading Game - a question and answer Moodle module? (Yes / No)

- Yes
- No

### Question 2

What kept you from participating in the game? (Items)

Rate on a scale from 1 (Does not apply) to 5 (Applies completely)

- Presentation in lecture has not been convincing
- I do not want to create an MCQ just for being in the game
- RG has not been recommended by the course lead
- The administrative procedure was too complex
- MCQs about calculations are impossible
- You do not need to learn for CB during the semester
- I have not heard anything good about it
- CB is an easy to learn subject – further support not needed
- Nothing, I have participated
- Technical problems

### Question 3

And are you aware of the lecture-specific topic of Capital Budgeting in QuizUp? (Yes / No)

- Yes
- No

### Question 4

(If answer to question 3 is "Yes")

Have you played the topic of Capital Budgeting in the QuizUp app? (Yes / No)

- Yes
- No

### Question 5

(If answer to question 4 is "Yes")

What is your impression of the topic Capital Budgeting in QuizUp? (Items)

What do you think about the following statements? (1: No, definitely not – 5: Yes, exactly)

- It is a good combination of gaming and learning
- Educational topics in Quiz Up are not so intriguing
- I switched very soon to entertainment topics
- The quality of MCQs must be improved
- Quiz Up is fun

## Question 6

When you must memorize factual knowledge- how do you approach it? (Items)

Rate on a scale from 1 (never) to 5 (always)

- Learning session using the script
- I am trying to learn during the semester
- I write flashcards
- I am joining a learning group
- I use a flashcard system
- I do not learn – what I need to know is in my head
- I use a learning app (Skive, Quizlet, ...)

## Question 7

Did we forget a strategy or method you follow to memorize factual knowledge? (Open Text)
